## Within Visit Test-Retest Reliability of EEG Profiles in Children with Autism Spectrum Disorder and Typical Development

1 **April R. Levin<sup>1\*†</sup>, Adam J. Naples<sup>2†</sup>, Aaron Wolfe Scheffler<sup>3</sup>, Sara J. Webb<sup>4,5</sup>, Frederick Shic<sup>4</sup>,**  
2 **Catherine A. Sugar<sup>6,7</sup>, Michael Murias<sup>8</sup>, Raphael A. Bernier<sup>5</sup>, Katarzyna Chawarska<sup>2</sup>,**  
3 **Geraldine Dawson<sup>10,11,12</sup>, Susan Faja<sup>13</sup>, Shafali Jeste<sup>7</sup>, Charles A. Nelson<sup>13</sup>, James C.**  
4 **McPartland<sup>2</sup>, Damla Şentürk,<sup>6\*</sup> and the Autism Biomarkers Consortium for Clinical Trials**

5 <sup>1</sup>Department of Neurology, Boston Children's Hospital and Harvard Medical School, Boston, MA,  
6 United States

7 <sup>2</sup>Child Study Center, School of Medicine, Yale University, New Haven, CT, United States

8 <sup>3</sup>Department of Epidemiology & Biostatistics, University of California San Francisco, San Francisco,  
9 CA, United States

10 <sup>4</sup>Center for Child Health, Behavior, and Development, Seattle Children's Research Institute, Seattle,  
11 WA, United States

12 <sup>5</sup>Department of Psychiatry and Behavioral Sciences, University of Washington, Seattle, WA, United  
13 States

14 <sup>6</sup>Department of Biostatistics, University of California Los Angeles, Los Angeles, CA, United States

15 <sup>7</sup>Department of Psychiatry and Biobehavioral Sciences, University of California Los Angeles, Los  
16 Angeles, CA, United States

17 <sup>8</sup>Institute for Innovations in Developmental Sciences, Northwestern University, Chicago, IL, United  
18 States

19 <sup>10</sup>Duke Institute for Brain Sciences, Duke University, Durham, NC, United States

20 <sup>11</sup>Duke Center for Autism and Brain Development, Duke University, Durham, NC, United States

21 <sup>12</sup>Department of Psychiatry and Behavioral Sciences, Duke University, Durham, NC, United States

22 <sup>13</sup>Laboratories of Cognitive Neuroscience, Division of Developmental Medicine, Boston Children's  
23 Hospital and Harvard Medical School, Boston, MA, United States

24 <sup>†</sup>These authors have contributed equally to this work and should be considered co-first authors.

### 25 \* Correspondence:

26 April R. Levin

27 [april.levin@childrens.harvard.edu](mailto:april.levin@childrens.harvard.edu)

28 Adam J. Naples

29 [adam.naples@yale.edu](mailto:adam.naples@yale.edu)

30 Damla Şentürk

31 [dsenturk@UCLA.edu](mailto:dsenturk@UCLA.edu)

32

33 James C. McPartland

34 [james.mcpartland@yale.edu](mailto:james.mcpartland@yale.edu)

35 **Keywords: EEG, Autism, Autism Spectrum Disorder, Test-Retest, Power, FOOOF, reliability**

36

## Test-Retest Reliability of EEG Power in Children with Autism and Typical Development

### 37 **Abstract**

38 Biomarker development is currently a high priority in neurodevelopmental disorder research. For  
39 many types of biomarkers (particularly biomarkers of diagnosis), reliability over short time periods is  
40 critically important. In the field of autism spectrum disorder (ASD), resting electroencephalography  
41 (EEG) power spectral densities (PSD) are well-studied for their potential as biomarkers. Classically,  
42 such data have been decomposed into pre-specified frequency bands (e.g., delta, theta, alpha, beta,  
43 and gamma). Recent technical advances, such as the Fitting Oscillations and One-Over-F (FOOOF)  
44 algorithm, allow for targeted characterization of the features that naturally emerge within an EEG  
45 PSD, permitting a more detailed characterization of the frequency band-agnostic shape of each  
46 individual's EEG PSD. Here, using two resting EEGs collected a median of 6 days apart from 22  
47 children with ASD and 25 typically developing (TD) controls during the Feasibility Visit of the  
48 Autism Biomarkers Consortium for Clinical Trials, we estimate within visit test-retest reliability  
49 based on characterization of the PSD shape in two ways: (1) Using the FOOOF algorithm we  
50 estimate six parameters (offset, slope, number of peaks, and amplitude, center frequency and  
51 bandwidth of the largest alpha peak) that characterize the shape of the EEG PSD; and (2) using  
52 nonparametric functional data analyses, we decompose the shape of the EEG PSD into a reduced set  
53 of basis functions that characterize individual power spectrum shapes. We show that individuals  
54 exhibit idiosyncratic PSD signatures that are stable over recording sessions using both  
55 characterizations. Our data show that EEG activity from a brief two-minute recording provides an  
56 efficient window into understanding brain activity at the single-subject level with desirable  
57 psychometric characteristics that persist across different analytical decomposition methods. This is a  
58 necessary step towards analytical validation of biomarkers based on the EEG PSD, and provides  
59 insights into parameters of the PSD that offer short-term reliability (and thus promise as potential  
60 biomarkers of trait or diagnosis) versus those that are more variable over the short term (and thus  
61 may index state or other rapidly dynamic measures of brain function). Future research should  
62 address longer-term stability of the PSD, for purposes such as monitoring development or response to  
63 treatment.

64

## 65 **Introduction**

66 Development of translational biomarkers is a crucial step towards clinical trial readiness for  
67 neurodevelopmental disorders such as Autism Spectrum Disorder (ASD).<sup>1</sup> The recent failure of  
68 several promising clinical trials<sup>2,3</sup> underscores the importance of biomarker development, and the  
69 need for a range of biomarkers serving a range of purposes. For example, a diagnostic biomarker can  
70 confirm presence or absence of a disorder, or identify individuals with a biologically-defined subtype  
71 thereof,<sup>4</sup> in order to guide patient selection for clinical trials. A monitoring biomarker can serially  
72 assess the status of a disorder,<sup>4</sup> and thus measure response to medical therapies or other exposures.  
73 The ideal properties of a given biomarker thus depend largely on its context of use. For example, a  
74 diagnostic biomarker should not change significantly over a given time window if the biology of the  
75 disorder it is indexing has not changed. On the other hand, a monitoring biomarker should change  
76 over time in a manner that reflects the biological impact of a medical treatment.

77  
78 One of the most promising imaging tools for biomarker development in neurodevelopmental  
79 disorders is electroencephalography (EEG). EEG is an index of the neural networks that bridge  
80 genotype to phenotype across a variety of ages, disorders, and species, and thus offers substantial  
81 promise for the development of scalable biomarkers that are relevant to the brain mechanisms  
82 underlying ASD.<sup>5,6</sup> Within EEG, the power spectral density (PSD), which represents the  
83 contributions of oscillations at various frequencies to the EEG, offers both diagnostic and monitoring  
84 potential. For example, among children with ASD compared to typical development, there is  
85 evidence that the resting PSD shows (at a group level) excessive power in the low (delta, theta) and  
86 high (beta, gamma) frequency bands and insufficient power in the middle (alpha) frequency bands<sup>7</sup>  
87 This suggests potential utility of some aspects of the PSD as a diagnostic biomarker for autism.  
88 Moreover, EEG is a measure of cortical activity and is thus fundamentally dynamic; it changes  
89 throughout development, across awake and asleep states, and in response to pharmacological  
90 treatment. This suggests that there may be aspects of the PSD that offer potential in other categories  
91 of biomarker development (e.g., monitoring or response biomarkers).

92  
93 Thus, to inform the development of biomarkers using EEG-based measures, it is necessary to  
94 evaluate the reliability of the PSD within an individual over brief time intervals, as well as across  
95 development and in response to various therapies. This is of particular importance in ASD, given the  
96 suggestion that intra-individual variability in brain activity may itself be an endophenotype of ASD.<sup>8</sup>  
97 Different features of the PSD may exhibit different measurement properties, with some parameters  
98 reflecting more transient or “state-like” properties of brain activity and others reflecting more stable  
99 “trait-like” interindividual differences. To begin this process, in the present study, we focus on test-  
100 retest reliability of the PSD and specific parameters thereof over a short time window (median of 6  
101 days) during which one would not expect significant changes in underlying diagnosis, developmental  
102 changes are minimal, no new treatments are given, and EEG is collected under identical conditions.

103  
104 Prior studies in healthy adults have demonstrated good to excellent test-retest reliability for certain  
105 features of the PSD. EEG power for mid-range frequencies (theta, alpha, and beta, as opposed to  
106 delta and gamma)<sup>9</sup> and relative power (as opposed to absolute power)<sup>10</sup> have shown correlation  
107 coefficients  $>.8$  for EEG sessions a few weeks apart; this is in the range of test-retest correlations for  
108 commonly used tests of cognitive ability.<sup>11,12</sup> Methodological advances in EEG pre-processing, such  
109 as robust reference to average and wavelet independent component analysis which act to attenuate  
110 the effects of data collection artifact, improve test-retest reliability in higher frequency bands such as  
111 beta and gamma.<sup>13</sup> However, the reliability of these features in children with or without  
112 neurodevelopmental disabilities remains unmeasured.

113

114 Notably, traditional methods of characterizing the PSD rely on measuring power within a particular  
115 frequency band, which conflates important aspects of underlying EEG activity. First, the EEG PSD  
116 typically contains a series of periodic oscillations atop an aperiodic background activity in which the  
117 power decreases as frequency ( $f$ ) increases, leading to a consistent  $1/f^\alpha$  distribution to the PSD, with  
118 the exponent  $\alpha$  determining the slope of this background activity. This aperiodic activity, and the  
119 offset thereof, may reflect crucial mechanistic underpinnings of brain activity,<sup>14</sup> such as tonic  
120 excitation/inhibition balance or total spiking activity of underlying neural populations respectively.<sup>15</sup>  
121 The influence of this background activity on the measurement of oscillatory activity is partially  
122 (though not completely) eliminated using techniques such as normalization or log transform of the  
123 PSD. Second, a priori assumptions about the frequency bands wherein oscillations occur may  
124 actually compromise accurate measurement and fail to capture meaningful variation of these  
125 oscillations. For example, averaging power in the predefined alpha range (e.g., 8-13 Hz) removes  
126 information about the peak alpha frequency in a given individual; however, the exact location of this  
127 alpha peak is well known to change with age and cognitive status<sup>16,17</sup> and can even occur outside of  
128 the 8-13 Hz range. Because oscillations rarely span the exact range specified in a frequency band,  
129 their activity can be inadvertently included in neighboring frequency bands if they are wide or  
130 shifted. Finally, in cases where a periodic oscillation has a narrow bandwidth or is nonexistent a  
131 prespecified frequency band, measurement of activity in that band will predominantly reflect  
132 aperiodic activity. For these reasons, it is useful to characterize the EEG as a unique profile, with  
133 parameterization informed by the shape of each individual's PSD rather than piecemeal averages  
134 across distinct frequency bands.

135  
136 As of October 2019 ClinicalTrials.gov reported 315 currently recruiting studies collecting EEG data  
137 and of those 102 were recruiting pediatric populations. Given the extent of this ongoing research,  
138 addressing how best to characterize the profile of the EEG PSD and determine its reliability and  
139 stability over time, particularly in clinical and developmental populations, is both important and  
140 timely. Such work forms an important foundation on which to base future research, and provides  
141 critical information to contextualize current findings.

142  
143 In this study we therefore explore the test-retest reliability of the profile of the EEG PSD in children  
144 with ASD and typical development (TD) over EEG recordings conducted within a short (~6 day)  
145 time-span. We applied two approaches to characterizing the profile of the PSD: (1) parametric  
146 model-based decomposition of the PSD into offset, slope, and oscillatory peaks using the Fitting  
147 Oscillations and One-Over-F (FOOOF) algorithm<sup>15</sup>; and (2) nonparametric functional data analysis,  
148 which identifies a small set of principal component functions that combine to describe the shape of  
149 the We hypothesized that these complementary approaches would exhibit high levels of short-term  
150 test-retest reliability. In this way, we demonstrate the utility of resting EEG PSD shape, and some  
151 specific parameters thereof, as stable biomarkers of cortical activity over short time windows.

## 152 **Materials and Methods**

154 These data were collected as part of the ongoing Autism Biomarkers Consortium for Clinical Trials  
155 (ABC-CT; [www.asdbiomarkers.org](http://www.asdbiomarkers.org)).<sup>18</sup> The objective of the ABC-CT is to evaluate a set of  
156 electrophysiological (EEG), eye-tracking, and behavioral measures for use in clinical trials for ASD.  
157 The ABC-CT began with a “Feasibility Study Visit,” which included the participants described  
158 below and involved two EEGs separated by a short window of time (median 6 days) as described  
159 below. The ABC-CT then moved on to the “Main Study Visits,” which included a larger number of  
160 participants, with EEGs separated by longer windows of time (6 weeks, and then 6 months). Only  
161 the data from the “Feasibility Study” is included here, as the focus of this manuscript is on the  
162 shorter-term test-retest reliability of the EEG PSD; this type of information (two EEGs separated by a

## Test-Retest Reliability of EEG Power in Children with Autism and Typical Development

163 few days) was not collected in the “Main Study.” This study was carried out in accordance with the  
164 recommendations of the central Institutional Review Board at Yale University, with written informed  
165 consent from a parent or legal guardian and assent from each child prior to their participation in the  
166 study.

### 167 *Participants:*

168 51 participants (25 with ASD, 26 with TD), aged 4 to 11 years, were enrolled in the feasibility phase  
169 of the ABC-CT; group characteristics are presented in Table 1. Groups differed significantly on age  
170 ( $t(45) = 2.3, p = .025$ ) and IQ ( $t(45) = 4.6, p < .001$ ) The “Feasibility Study Visit” consisted of two  
171 EEGs on two separate days (termed here “Day 1” and “Day 2”), separated by a short window of time  
172 (range 1-22 days, median 6 days) during this phase. Participants were characterized using rigorous  
173 autism diagnostic standardized measures (Autism Diagnostic Observation Schedule, 2<sup>nd</sup> edition  
174 (ADOS-2),<sup>19</sup> Autism Diagnostic Interview - Revised (ADI-R),<sup>20</sup> and Diagnostic and Statistical  
175 Manual of Mental Disorders (DSM-5) criteria<sup>21</sup>) by research-reliable clinicians<sup>22</sup>, and cognitive  
176 measures Differential Ability Scales 2<sup>nd</sup> edition (DAS-II).<sup>23</sup>

### 178 *EEG Protocol:*

179 In the feasibility phase of the ABC-CT, EEG acquisition included 6 paradigms,<sup>24</sup> with “Resting EEG  
180 eyes open during calm viewing” of silent, chromatic digital videos (similar to screensavers) collected  
181 twice on two separate days. Video stimuli consisted of six 30 second non-social abstract videos  
182 purchased from Shutterstock, which were presented to the participant in random order in 3 blocks of  
183 1 minute on each day.<sup>25</sup> The videos were played forward for 15 seconds and then reversed for the  
184 following 15 seconds. To allow for counterbalancing of the methods used in the ABC-CT (Eye  
185 Tracking and EEG), at screening, participants were stratified based on variables that could be  
186 assessed by phone to include group (ASD/TD), biological sex (male/female), age (split at 8 years 6  
187 months), and cognitive ability (ASD only, assessed in person by a trained clinician at first visit). Half  
188 of the participants received eye tracking first at each visit and the other half received EEG first.

189  
190 All sites had a high density EEG acquisition system (Philips Neuro, Eugene, OR), including either  
191 Net Amps 300 (Boston Children’s Hospital, University of California Los Angeles, University of  
192 Washington, and Yale University) or Net Amps 400 amplifiers (Duke University). All sites used the  
193 128 electrode HydroCel Geodesic Sensor Nets, applied according to Philips Neuro/Electrical  
194 Geodesics, Inc. standards. Four of the five sites removed electrodes 125-128, which are positioned  
195 on the participant’s face, from the EEG caps to tolerability of wearing the cap. Appropriate EEG  
196 acquisition protocols and software (500Hz sampling rate, MFF file format, onset recording of  
197 amplifier and impedance calibrations) were provided to each site. EPrime 2.0 (Psychological  
198 Software Tools, Sharpsburg, PA) was used for experimental control. The coordinating site reviewed  
199 and provided feedback on net application, adherence to administration protocol, and data quality for  
200 every session. Sites conducted regular monthly checks of equipment function.

201  
202 One participant with ASD refused to wear the net; EEG data was therefore available on 24 ASD and  
203 26 TD participants. After the preprocessing described below, EEG from one additional ASD  
204 participant was excluded from the parametric and nonparametric data analyses due to having a  
205 substantially lower number of observed segments than the rest of the sample (61 segments versus an  
206 average of 91 segments) and only one day of EEG recording. Thus, in total, there was usable data on  
207 at least one day from 23 ASD and 26 TD participants. Data on an additional one ASD and one TD  
208 participant were recorded only on day 1. There was thus usable data on both days from 22 ASD and  
209 25 TD participants.

210  
211

## Test-Retest Reliability of EEG Power in Children with Autism and Typical Development

### 212 *Pre Processing of the EEG:*

213 Processing of the raw EEG data was done using the Harvard Automated Processing Pipeline for  
214 Electroencephalography (HAPPE)<sup>26</sup> embedded within the Batch EEG Automated Processing  
215 Platform (BEAPP).<sup>27</sup> In brief, data were 1 Hz high pass and 100 Hz low pass filtered, down sampled  
216 to 250 Hz, and run through the HAPPE module including selection of 18 channels corresponding to  
217 the 10-20 system channels (excluding Cz, as data were originally collected in reference to Cz), 60 Hz  
218 electrical line noise removal, bad channel rejection, wavelet-enhanced thresholding, independent  
219 component analysis with automated component rejection,<sup>28,29</sup> automated segment rejection,  
220 interpolation of bad channels, and re-referencing to average. Data were then segmented into two  
221 second segments, and the PSD was calculated via multitaper spectral analysis<sup>30,31</sup> using three tapers.  
222 The PSD was estimated for each participant and electrode by averaging the PSDs of artifact free  
223 segments. Scalp-wide spectral densities were obtained by averaging spectral densities across the 18  
224 electrodes for each subject on each day.

225

### 226 *Parametric Decomposition of Periodic and Aperiodic Activity:*

227 In order to characterize periodic and aperiodic features of the PSD profile, we used the Fitting  
228 Oscillations and One-Over-F (FOOOF) algorithm.<sup>15</sup> The algorithm operates by removing an  
229 aperiodic slope (Figure 1) from the absolute PSD in the semilog-power space (linear frequencies and  
230 logged power), which is fully characterized by offset and slope terms. After removing the aperiodic  
231 component, the spectral density contains periodic oscillatory peaks that are modeled as a finite sum  
232 of Gaussians. Each Gaussian peak is defined by its amplitude, center frequency, and bandwidth.  
233 Thus, the PSD profile, including both the aperiodic background and periodic oscillations, can be fully  
234 parameterized by the following parameters: offset, slope, number of peaks (Gaussians), and the  
235 center frequency, amplitude, and bandwidth for each peak. These scalar features are then available  
236 for analysis across recording sessions using standard statistical techniques. The FOOOF model  
237 parameters were chosen by visually inspecting model fit across a range of parameters, blind to  
238 participant group and recording session, and selecting those which best captured oscillatory peaks  
239 across all of the recordings. A single parameter set was selected for all recordings. Specifically, the  
240 peak bandwidth of oscillatory peaks ranged between 1 and 10 Hz, and the minimum peak height (to  
241 be included in the fit) was 1.85 standard deviations above the aperiodic background activity.

242

243 Since the number of total peaks identified on each spectral density varied across subjects and days,  
244 for comparison purposes across consecutive days we first considered the agreement of the location  
245 (in terms of frequency band, i.e. delta [2-4 Hz], theta [4-6 Hz], low alpha [6-9 Hz], high alpha [9-13  
246 Hz], beta [13-30 Hz], and gamma [30-55 Hz]) of the peak with the largest amplitude between days.  
247 For comparison of the largest peak features (center frequency, amplitude, and bandwidth), we then  
248 considered the largest peak in the entire alpha band for stability of results and ease of comparison  
249 between diagnostic groups. This allowed characterization of each scalp-wide spectral density by six  
250 FOOOF parameters: offset, slope, number of peaks, and (for the largest peak in the alpha range)  
251 center frequency, amplitude, and bandwidth. The agreement of these six FOOOF parameters across  
252 the two days for each diagnostic group was evaluated using the intraclass correlation coefficient (the  
253 ratio of between person variance to total variance) (ICC).<sup>32</sup> ICC values less than .40 are considered  
254 poor, between .40 and .59 fair, between .60 and .74 good, and between .75 and 1.00 excellent.<sup>33</sup> For  
255 all reported ICC values, bootstrap based on resampling subjects with replacement was used for  
256 forming percentile confidence intervals (CI). Bootstrap methods yield more reliable inference in  
257 small samples (bootstrap CIs were based on 200 resampled data sets).

258

### 259 *Nonparametric Analysis of the Relative Spectral Density via Functional Data Analysis:*

## Test-Retest Reliability of EEG Power in Children with Autism and Typical Development

260 Scalp-wide relative spectral densities were obtained by averaging relative spectral densities across  
261 electrodes for each subject observed on each day. The agreement in relative spectral density across  
262 days for both electrode-specific and scalp-wide relative spectral densities was computed by  
263 functional ICC within each diagnostic group. Since a trend of lower functional ICC was observed for  
264 the most peripheral electrodes (electrodes 9 [FP2], 22 [FP1], 45 [T3], 70 [O1], 83 [O2] and 108 [T4])  
265 across diagnostic groups, a sensitivity analysis was also run through the functional ICC of the scalp-  
266 wide relative spectral densities excluding these six electrodes. Computation of functional ICC  
267 follows a functional ANOVA decomposition of the data within each diagnostic group. Days are the  
268 within subject factor, where the functional ICC can be interpreted as the inter-subject correlation of  
269 the entire relative spectral density across days. The functional ANOVA model is fit using a  
270 multilevel functional principal components decomposition<sup>34</sup> which entails estimation of subject- and  
271 day-level eigenvalues and eigenfunctions that enrich interpretations by allowing us to connect the  
272 nonparametric functional data analysis to results from the parametric analysis via FOOOF. For all  
273 reported functional ICC values, bootstrap percentile CIs were formed based on 200 resampled data  
274 sets based on resampling from subjects with replacement.  
275

### 276 **Results**

277 Age, sex, and IQ for study participants is in Table 1.

278  
279 The power spectrum of each individual on day 1 and day 2 is plotted in Figure 2. Within participant  
280 PSD shapes exhibit striking visual similarity across separate recording sessions.

281  
282 Data quality metrics output from HAPPE<sup>26</sup> are described in Table 2. Overall, data quality was high  
283 across groups.

#### 284 *Parametric Analysis of the Absolute Power Spectral Density via FOOOF:*

285 The location of the dominant peak (i.e. the peak with the greatest amplitude according to the FOOOF  
286 algorithm) from both days are provided in Table 3 for both diagnostic groups. The dominant peak  
287 occurred most frequently in the high alpha frequency band in the ASD group and low alpha  
288 frequency band in the TD group. Across days, while the dominant peak stayed within the alpha band  
289 (low and high alpha) mostly for the TD group, it stayed more broadly within the alpha-beta range in  
290 the ASD group.  
291

292  
293 The estimated ICCs along with their bootstrap CIs for agreement of the six FOOOF parameters  
294 derived from scalp-wide absolute PSD across the two experimental days are provided in Table 4 for  
295 both diagnostic groups. Among offset, slope, and number of peaks, offset yielded consistently fair  
296 agreement in both groups (TD 0.484 95% CI [0.004, 0.775]; ASD 0.525 95% CI [0.167, 0.806]),  
297 with slope between the two days showing poor agreement in the TD group (0.284 95% CI [0,0.674])  
298 but good agreement in the ASD group (0.699 95% CI [0.527, 0.815]). Among the three FOOOF  
299 parameters describing the largest alpha peak, amplitude had the highest ICC in both groups (TD  
300 0.862 95% CI [0.729, 0.939]; ASD 0.828 95% CI [0.664, 0.926]), followed by center frequency (TD  
301 0.700 95% CI [0.437, 0.862]; ASD 0.619 95% CI [0.342, 0.852]), and bandwidth (TD 0.424 95% CI  
302 [0.028, 0.696]; ASD 0.340 95% CI [0.034, 0.727]). While the agreement of the largest alpha peak  
303 amplitude was high in both groups, agreement in the peak frequency was slightly higher in the TD  
304 group than the ASD group. In the sensitivity analysis, when the analysis was repeated on FOOOF  
305 parameters derived after exclusion of the six peripheral electrodes, these results remained unchanged.  
306

307 *Nonparametric Analysis of the Relative Power Spectral Density via Functional Data Analysis:*

## Test-Retest Reliability of EEG Power in Children with Autism and Typical Development

308 The estimated functional ICC for the scalp-wide relative spectral density was excellent in both  
309 groups, though higher in the TD group than the ASD group (TD 0.858 95% CI [0.748, 0.926]; ASD  
310 0.807 95% CI [0.650, 0.914]). The estimated functional ICC for each of the 18 electrodes and their  
311 95% bootstrap CIs are shown by diagnostic group in Figure 3. While the average electrode-specific  
312 ICC in the TD group is approximately equal to that of the ASD group, there is greater variation in the  
313 functional ICC among electrodes in the TD group (both higher and lower values of the functional  
314 ICC) compared to the ASD group. In the sensitivity analysis, the estimated scalp-wide functional  
315 ICC for both diagnostic groups was slightly higher when the six peripheral electrodes are excluded  
316 (TD 0.874 95% CI [0.741, 0.931]; ASD 0.815 95% CI [0.712, 0.913]), though the magnitude of  
317 difference between the two diagnostic groups was unchanged.

318  
319 The functional ANOVA model captures individual deviations from the mean scalp-wide relative  
320 spectral density over the two days by partitioning the total variance into participant- and day-level  
321 variation. Participant-level variation captures the variation among participants whereas day-level  
322 variation captures the variation within a subject across days. Within each level of variation, ordered  
323 curves known as eigenfunctions identify which portions of the frequency domain account for the  
324 most variation by placing more magnitude at these locations. The two estimated leading participant-  
325 and day-level eigenfunctions for both diagnostic groups are shown in Figure 4. We restrict our  
326 discussion to the first two participant-level eigenfunctions, since combined they explain at least 60%  
327 of the total variation in both groups. We include the first two day-level eigenfunctions for  
328 completeness. The first participant-level eigenfunction for both groups displays that most variation in  
329 the data is explained by the variation in the amplitude of the alpha peak (with maximal variation at  
330 approximately 9 Hz), explaining similar total variation for the TD group (48% total variance  
331 explained) and the ASD group (43% total variance explained). While the first subject-level  
332 eigenfunction highlights variation in the amplitude of the largest peak, the second subject-level  
333 eigenfunction highlights the variation in the frequency (location) of the largest peak, where TD  
334 subjects show the largest variation in the low and high alpha band (24% total variance explained) and  
335 ASD subjects show it in high alpha and beta relative power (18% variance explained). These findings  
336 are consistent with the locations of the largest peak summarized in Table 3 across days for the two  
337 groups. The fact that most of the variation is explained by the subject-level eigenfunctions (compared  
338 to day-level eigenfunctions) supports our interpretation that most of the variation in the data is  
339 variation across subjects and there is less variability within a subject across days. In addition,  
340 participants maintain stable alpha peaks across experimental days, both in terms of peak frequency  
341 and amplitude, consistent with the high ICCs reported in Table 4 for alpha peak amplitude and  
342 frequency in the two groups in the FOOOF analysis.

### 343 344 **Discussion**

345 In this manuscript, we examine the test-retest reliability of the EEG power spectral density in  
346 children with ASD and TD. EEG power-based measures are currently being evaluated and employed  
347 as biomarkers in a variety of neurodevelopmental and psychiatric disorders, and analytical validation  
348 (including understanding the test-retest reliability of these measures) is an important early step in the  
349 biomarker development process.<sup>35</sup>

350  
351 Overall, our findings demonstrate excellent test-retest reliability for scalp-wide EEG profiles. This  
352 high test-retest reliability reflects the overall stability of the EEG power spectrum over relatively  
353 short time windows (a few days). For the development of diagnostic biomarkers, this reliability is  
354 crucial – we would not expect the fundamental biology of the brain to change over several days, and  
355 therefore biomarkers indexing brain function for diagnostic purposes should not change significantly  
356 over this time period.



## Test-Retest Reliability of EEG Power in Children with Autism and Typical Development

357

358 On the other hand, there are scenarios in which we would not expect (or want) aspects of the EEG  
359 power spectrum to remain stable. For example, while markers of phenotypic traits may remain  
360 stable, markers of state may vary over short time periods. For example, changes in emotional state  
361 during testing, and attention to the stimuli, may lead to changes in EEG power that reflect true  
362 physiologic changes in brain function over even short time windows. Identifying the parameters of  
363 the EEG PSD that predominantly reflect trait, and separately those that predominantly reflect state,  
364 will allow us to harness the wealth of information available from EEG recordings to develop a range  
365 of biomarker types. This concept will be crucial for future studies as well. For example, monitoring  
366 biomarkers will ideally remain relatively stable when treatment is not given, but show significant  
367 change in response to targeted medical treatments.

368

369 The high test-retest reliability for EEG profiles is present in both TD and ASD groups, though  
370 reliability was higher overall in the TD group (ICC 0.858) than the ASD group (ICC 0.807). This is  
371 consistent with prior findings suggesting more variable neural activity in ASD compared to TD<sup>8</sup> and  
372 may suggest that reliability, in addition to providing important information for biomarker  
373 development, may in and of itself represent a potential biomarker. It is also possible that the lower  
374 mean IQ in the ASD group (or, perhaps less likely, the higher mean age of the ASD group)  
375 contributed to this difference. Notably, higher neural variability may reflect (or provoke) more  
376 variable emotional states during testing and more variable attention to the stimuli. Such factors are  
377 often found to be clinically more variable among children with ASD.

378

379 Because the EEG PSD captures a range of parameters, it is important to consider specifically which  
380 of those parameters have high short-term test-retest reliability (and thus offer potential for diagnostic  
381 biomarker development), versus those with low short-term test-retest reliability (potentially reflecting  
382 state, attention or perhaps noise). Our findings suggest that within the PSD, a relatively small set of  
383 parameters are largely responsible for capturing the fingerprint-like quality of each individual's EEG.  
384 FOOOF-based parameterization suggests that the alpha peak is particularly useful for individualizing  
385 the power spectrum. Within the alpha peak, amplitude offers particular promise in this regard,  
386 although the center frequency of the alpha peak also provides strong reliability within individuals.  
387 Here, it is particularly notable that the frequency of alpha is often considered to be an individual trait  
388 (changing only gradually with age and other factors but otherwise remaining relatively stable in most  
389 cases), whereas alpha amplitude varies more with state. For example, the posterior dominant rhythm  
390 tends to arise when the eyes are closed and is suppressed with eye opening; similarly, mu rhythms  
391 over the motor cortex are suppressed by imagining or engaging in motor tasks. However, our  
392 findings suggest that in the context of the environment in which EEGs were collected in the ABC-CT  
393 (watching silent, screen-saver type videos), alpha amplitude remains quite stable – even more so, in  
394 fact, than alpha frequency.

395

396 For the slope of the power spectrum as measured by FOOOF, ICC was good in the ASD group but  
397 poor in the TD group. This suggests that slope (at least as measured by FOOOF with the parameters  
398 used here) is unstable across sessions in the TD group. One possible explanation for this is that the  
399 TD group may be more sensitive to session effects (e.g., due to habituation, adaptation, or learning)  
400 than the ASD group, and this is being reflected in the slope. It is also possible that the older mean  
401 age or lower mean IQ of the ASD group, rather than TD or ASD status per se, contributed to this  
402 difference. An alternative explanation, supported by visual review of figure 2, is that there is very  
403 little inter-individual variability in the PSD slope among the TD group; therefore, intra-individual  
404 reliability (across days) cannot be much higher than inter-individual reliability (across participants) in  
405 the TD group, because inter-individual reliability is high to begin with. In the ASD group, which may

## Test-Retest Reliability of EEG Power in Children with Autism and Typical Development

406 be more heterogeneous given the wide variety of genetic and other underlying factors that lead to  
407 ASD, the inter-individual variability in slope is higher. In this case, similarly strong intra-individual  
408 reliability in the TD and ASD groups would lead to a higher ICC in the ASD group, because of the  
409 higher inter-individual variability in this group.

410  
411 Importantly, the eigenfunctions which best characterized PSD shape exhibited the most variance at  
412 relatively low frequencies (4-13hz), corresponding to overall offsets of the PSD and in the theta to  
413 alpha range of the EEG, aligning with the parametric findings from FOOOF and highlighting the  
414 import of this frequency range for characterizing stable inter-individual differences in brain activity.  
415 This finding, combined with the tendency for variance to be explained by activity at slightly higher  
416 frequencies in the ASD group (alpha-beta) than TD participants (predominantly alpha), may help to  
417 explain the higher estimated ICC for offset and slope in the ASD group compared to TD. Because the  
418 slope and offset terms in FOOOF are fit in the semilog-power space, these parameters are sensitive to  
419 power dynamics at higher frequencies, which are often of lower magnitude.

420 For the nonparametric analyses of relative power, reliability in both groups improves with removal of  
421 peripheral electrodes. Notably, because peripheral electrodes are closer than central electrodes to  
422 many non-brain-based sources of detected activity (e.g., muscle and eye movements), they are often  
423 more susceptible to artifact than more central electrodes. This suggests (perhaps reassuringly) that  
424 brain-based findings, more so than artifact-based findings, remain stable across EEG sessions within  
425 an individual. On the other hand, for the parametric analyses of absolute power, removal of  
426 peripheral electrodes does not improve reliability. This may be because the majority of parameters  
427 identified by FOOOF are not significantly affected by artifact in peripheral electrodes, raising the  
428 possibility that FOOOF is less susceptible to artifact contamination than nonparametric analyses; this  
429 may be further studied in future work.

430  
431 Nonparametric analyses otherwise reveal complementary results to the parametric analyses.  
432 Parametric analyses reveal excellent ICC for the amplitude of the largest alpha peak and good ICC  
433 for the frequency of the largest alpha peak. This is true in both the ASD and TD groups, though the  
434 ICC in the TD group is slightly higher than that in the ASD group for both of these parameters.  
435 Similarly, nonparametric analyses highlight alpha amplitude as capturing the majority of variance for  
436 the participant-level spectral densities, followed by alpha frequency. This is again true in both the  
437 ASD and TD groups, though slightly more variance is captured by the first two eigenfunctions in the  
438 TD as compared to the ASD group. Parametric functions also demonstrate that the dominant peak  
439 tended to stay within the alpha band for the TD group, but tended to stay more broadly in the range  
440 of both the alpha and beta bands for the ASD group. Similarly, nonparametric functions demonstrate  
441 that the TD participants show the largest variation in the alpha band, whereas ASD participants show  
442 variation in alpha but also extending into beta.

443  
444 Nonparametric functional data analysis and FOOOF thus provide convergent and complementary  
445 approaches to characterizing the PSD. Nonparametric functional data analysis characterizes PSD  
446 shape accurately and with a small number of principle functions yielding high levels of reliability.  
447 However, it relies on “learning” these functions based on the current data set and thus yields different  
448 principle functions based on the input data, as we see here between our diagnostic groups.  
449 Additionally, the resulting functions need careful interpretation to ground their relationship with  
450 brain activity. Conversely, FOOOF estimates require more parameters to characterize the PSD.  
451 However, fitting these parameters does not depend on the presence of other members of the data set,  
452 (although the algorithm fitting settings can indirectly force information sharing among power  
453 spectra). Also, the interpretation of FOOOF parameters is more direct. FOOOF explicitly attempts to  
454 separate biophysically meaningful model parameters such as slope, offset, and oscillatory peaks.

## Test-Retest Reliability of EEG Power in Children with Autism and Typical Development

455

456 It is important to note the specific questions that the present study is designed to answer. First, the  
457 two testing days for each individual took place within approximately a week. While this suggests  
458 promise for biomarker development in trials where EEG-based findings are expected to change over  
459 very short periods of time, many pharmacological interventions aim to change neural activity over  
460 the longer term (weeks, months, or longer). Examining test-retest stability of the EEG power  
461 spectrum over these longer periods is part of ongoing analyses for the ABC-CT main study, which  
462 will include 6 week and 6 month follow-up recordings. Additionally, here we report only test-retest  
463 reliability for a single set of EEG measures, all based on the power spectrum. EEG is a rich source of  
464 information beyond that which can be captured in the power spectrum, in both the time domain and  
465 the frequency domain. As future studies suggest additional EEG-based measurements that may offer  
466 promise for biomarker developments, the test-retest reliability of the measurements will need to be  
467 explicitly evaluated.

468

469 Developing biomarkers for ASD and other neurodevelopmental disorders remains a high priority in  
470 the field, given the potential benefits biomarkers offer for clinical trials, diagnostics, and monitoring.<sup>4</sup>  
471 While future studies will continue to assess which measurements (in EEG and otherwise) offer the  
472 most promise as potential biomarkers of various types, our findings of high short-term test-retest  
473 reliability of the EEG power spectral density are a crucial step towards ensuring that potential  
474 biomarkers meet necessary criteria for validation.

## Test-Retest Reliability of EEG Power in Children with Autism and Typical Development

475

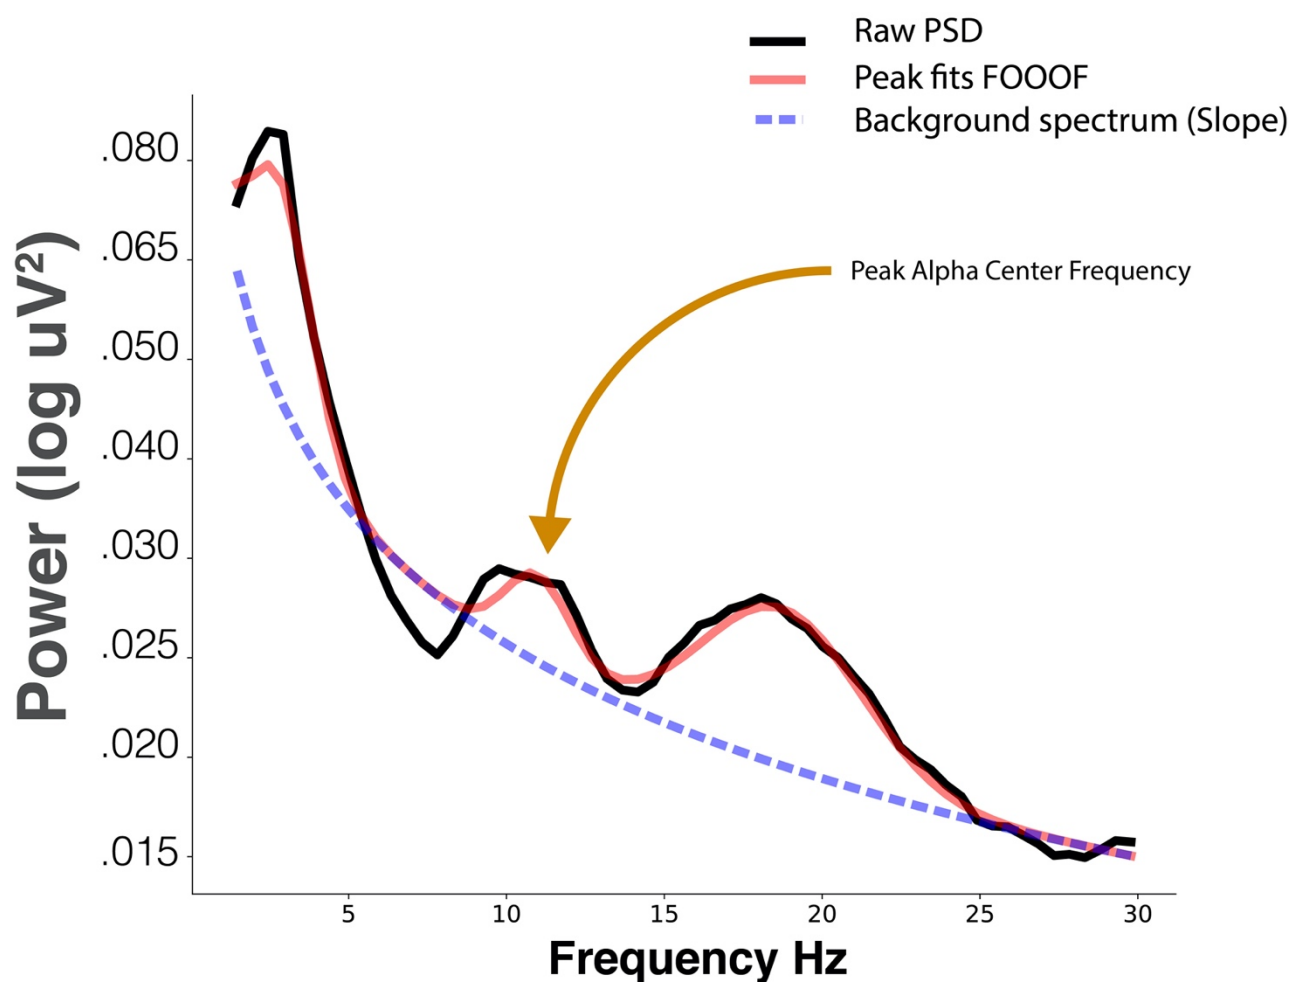

476

477 **Figure 1:** Parameters extracted from FOOOF decomposition of the PSD. FOOOF models individual  
478 oscillatory peaks atop the PSD and estimates the slope and offset of aperiodic activity below those  
479 peaks.

480

## Test-Retest Reliability of EEG Power in Children with Autism and Typical Development

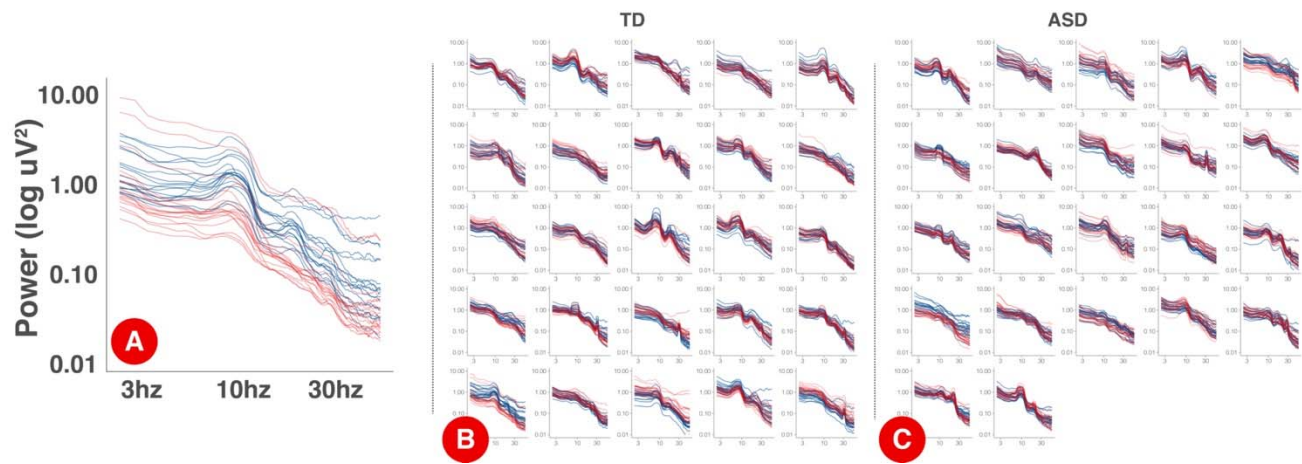

481

482 **Figure 2:** PSDs for each session by participant. Panel A displays an expanded, single participant,  
483 PSD with the log-10 axis labels. Each electrode is a single line. Day one PSDs are shown in blue and  
484 day 2 PSDs are shown in red. Panels B and C show individual PSDs for TD (B) and ASD (C)  
485 participants. Each smaller figure is data from a single participant.  
486

## Test-Retest Reliability of EEG Power in Children with Autism and Typical Development

487

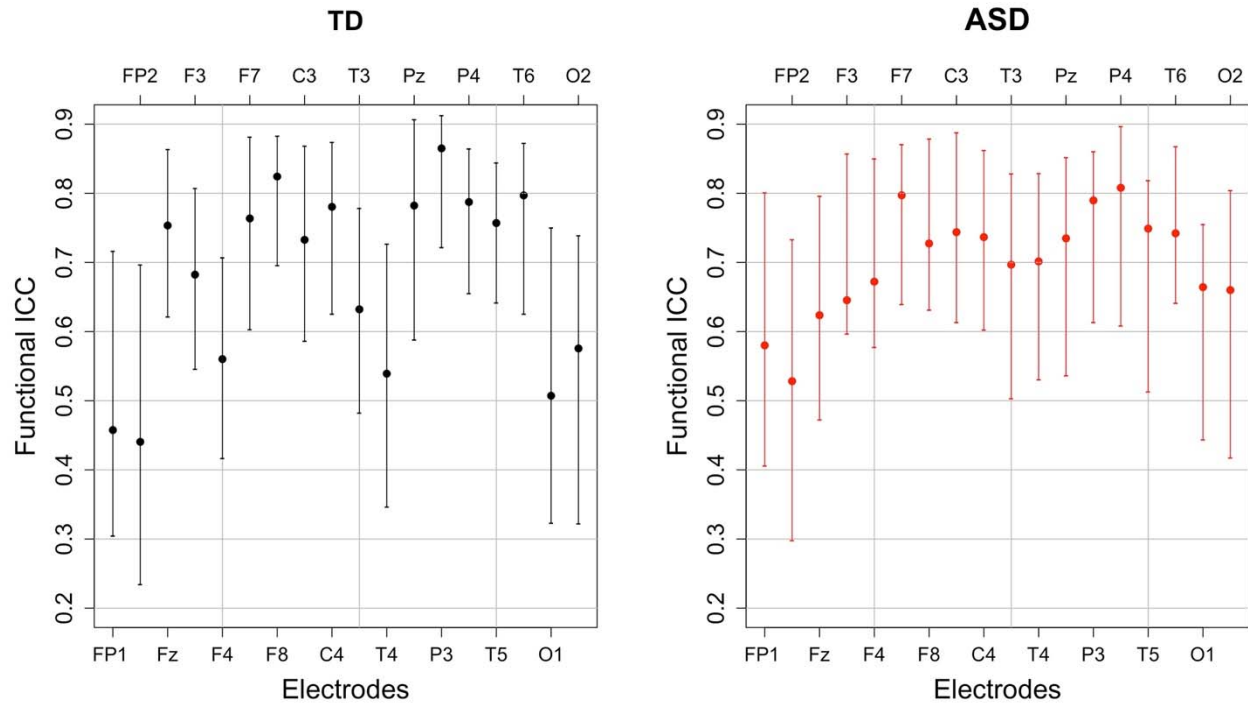

488

489

490

**Figure 3:** The estimated electrode-specific functional intraclass correlations and their 95% bootstrap confidence intervals by diagnostic group.

## Test-Retest Reliability of EEG Power in Children with Autism and Typical Development

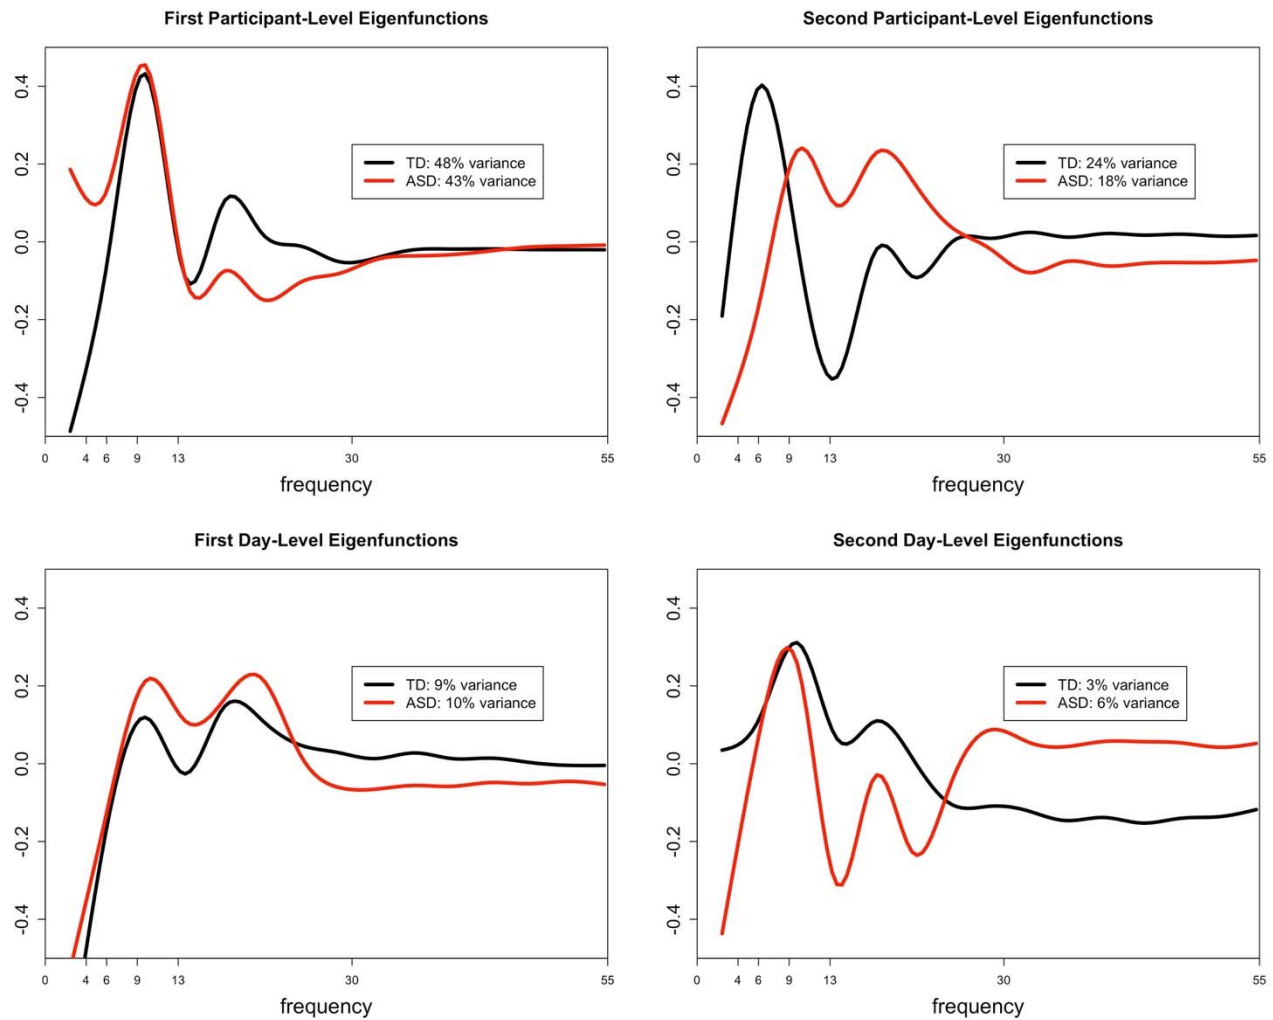

491  
492 **Figure 4:** The estimated first and second leading eigenfunctions for the participant-level variation  
493 (top row) and day-level variation (bottom row) for each diagnostic group. The total variation  
494 explained by each component is included in the legend.  
495

## Test-Retest Reliability of EEG Power in Children with Autism and Typical Development

### 496 Tables

497 **Table 1:** Participant sex, age, and IQ by diagnostic group. \* indicates measures that differ by group,  
498 as described in the text.

499

| <b>GROUP</b> | <b>N (N<br/>FEMALE)</b> | <b>MEAN<br/>AGE (Y)</b> | <b>MIN. AGE<br/>(Y)</b> | <b>MAX. AGE<br/>(Y)</b> | <b>MEAN IQ<br/>(SD)</b> |
|--------------|-------------------------|-------------------------|-------------------------|-------------------------|-------------------------|
| ASD          | 24 (5)                  | 8.0*                    | 4.42                    | 11.4                    | 95 (21.2)*              |
| TD           | 26 (9)                  | 6.6                     | 4.01                    | 11.4                    | 120 (12.4)              |

500

501



## Test-Retest Reliability of EEG Power in Children with Autism and Typical Development

502 **Table 2:** Data quality measures, based on HAPPE metrics. Data are reported as mean (SD). EEG  
503 segments are 2 seconds long.  
504

| Group | Day | Good Channels (%) | # of EEG segments retained | Rejected components (%) | EEG variance retained (%) | Mean retained artifact probability | Median retained artifact probability |
|-------|-----|-------------------|----------------------------|-------------------------|---------------------------|------------------------------------|--------------------------------------|
| ASD   | 1   | 95.4 (3.4)        | 90.7 (1.8)                 | 29 (11)                 | 70.2 (17.1)               | 0.08 (0.03)                        | 0.03 (0.02)                          |
|       | 2   | 95.9 (3.9)        | 90.7 (1.8)                 | 30 (12)                 | 70.6 (15.8)               | 0.08 (0.03)                        | 0.02 (0.02)                          |
| TD    | 1   | 97.4 (3.8)        | 90.8 (1.7)                 | 18 (10)                 | 82.5 (13.2)               | 0.05 (0.02)                        | 0.01 (0.01)                          |
|       | 2   | 97.1 (3.8)        | 90.9 (1.7)                 | 19 (10)                 | 80.2 (15.2)               | 0.06 (0.04)                        | 0.02 (0.02)                          |

505  
506  
507

## Test-Retest Reliability of EEG Power in Children with Autism and Typical Development

508 **Table 3:** The location of the dominant peak in day 1 (rows) versus day 2 (columns) among the TD  
509 and ASD groups. Values indicate the number of participants with a given combination of dominant  
510 peak locations across days.  
511

| <b>TD</b>  |           |            |      |       |
|------------|-----------|------------|------|-------|
| Day 1/2    | low_alpha | high_alpha | beta | gamma |
| low_alpha  | 6         | 6          | 0    | 0     |
| high_alpha | 5         | 3          | 0    | 1     |
| beta       | 1         | 1          | 0    | 0     |
| gamma      | 1         | 0          | 0    | 1     |

| <b>ASD</b> |           |            |      |       |
|------------|-----------|------------|------|-------|
| Day 1/2    | low_alpha | high_alpha | beta | gamma |
| low_alpha  | 2         | 2          | 1    | 0     |
| high_alpha | 2         | 4          | 3    | 0     |
| beta       | 2         | 3          | 1    | 0     |
| gamma      | 0         | 1          | 1    | 0     |

512  
513  
514

## Test-Retest Reliability of EEG Power in Children with Autism and Typical Development

515 **Table 4:** The estimated intraclass correlation coefficients (ICCs) and their 95% bootstrap confidence  
516 intervals for the six FOOOF parameters for each diagnostic group.  
517

| FOOOF Parameter                     | TD                   | ASD                  |
|-------------------------------------|----------------------|----------------------|
| Offset                              | 0.484 (0.004, 0.775) | 0.525 (0.167, 0.806) |
| Slope                               | 0.284 (0, 0.674)     | 0.699 (0.527, 0.815) |
| Number of peaks                     | 0.081 (0, 0.571)     | 0.226 (0.003, 0.609) |
| Largest alpha peak center frequency | 0.700 (0.437, 0.862) | 0.619 (0.342, 0.852) |
| Largest alpha peak amplitude        | 0.862 (0.729, 0.939) | 0.828 (0.664, 0.926) |
| Largest alpha peak bandwidth        | 0.424 (0.028, 0.696) | 0.340 (0.034, 0.727) |

518

519

## Test-Retest Reliability of EEG Power in Children with Autism and Typical Development

### 520 **Conflict of Interest**

521 ARL, AJN, AS, SJW, CS, MM, RAB, KC, SF, CAN, JCM, and DS declare that the research was  
522 conducted in the absence of any commercial or financial relationships that could be construed as a  
523 potential conflict of interest.

524  
525 Frederick Shic is a consultant for and has received research funding from both Janssen Research and  
526 Development and Roche Pharmaceutical Company.

527  
528 Geraldine Dawson is on the Scientific Advisory Boards of Janssen Research and Development, Akili,  
529 Inc., LabCorp, Inc., Tris Pharma, and Roche Pharmaceutical Company, a consultant for Apple, Inc.,  
530 Gerson Lehrman Group, Guidepoint, Inc., Teva Pharmaceuticals, and Axial Ventures, has received  
531 grant funding from Janssen Research and Development, and is CEO of DASIO, LLC. Dawson has  
532 developed technology that has been licensed and Dawson and Duke University have benefited  
533 financially. Dawson receives royalties from Guilford Press, Springer, and Oxford University Press.

534  
535 Shafali Jeste is a consultant for Roche Pharmaceutical Company, and receives grant funding from  
536 Roche Pharmaceutical Company.

537

### 538 **Author Contributions**

- 539 • ARL, AJN, AS, SJW, FS, CS, MM, RAB, KC, GD, SF, SJ, CAN, JCM, and DS made  
540 substantial contributions to the conception or design of the ABC-CT.
- 541 • ARL, AJN, AS, and DS contributed to the analysis of the data described in this manuscript.
- 542 • ARL, AJN, AS, SJW, and DS contributed to the drafting this manuscript.
- 543 • ARL, AJN, AS, SJW, FS, CS, MM, RAB, KC, GD, SF, SJ, CAN, JCM, and DS provided  
544 critical revisions related to the important intellectual content.
- 545 • All named authors read and provided approval for publication of the content.

### 546 **Funding**

547 Support for this project was provided by the Autism Biomarkers Consortium for Clinical Trials  
548 (NIMH U19 MH108206; McPartland).

### 549 **Acknowledgments**

550 A special thanks to all of the families and participants who join with us in this effort. In addition, we  
551 thank our external advisor board, NIH scientific partners, and the FNIH Biomarkers Consortium.

552  
553 Additional important contributions were provided by members of the ABC-CT consortium including  
554 Heather Borland and Megha Santhosh, who were responsible for EEG acquisition including EEG  
555 experimental and pipeline programming, site training and initiation, and quality control.

556

### 557 **References**

- 558 1. Sahin M, Jones SR, Sweeney JA, et al. Discovering translational biomarkers in  
559 neurodevelopmental disorders. *Nat Rev Drug Discov.* 2018;in press(December):7-9.
- 560 2. Berry-Kravis EM, Lindemann L, Jøneh AE, et al. Drug development for neurodevelopmental  
561 disorders: Lessons learned from fragile X syndrome. *Nat Rev Drug Discov.* 2018;17(4):280-  
562 298.
- 563 3. Krueger DA, Sadhwani A, Byars AW, et al. Everolimus for treatment of tuberous sclerosis

## Test-Retest Reliability of EEG Power in Children with Autism and Typical Development

- 564 complex-associated neuropsychiatric disorders. *Ann Clin Transl Neurol.* 2017;4(12):877-887.
- 565 4. FDA-NIH Biomarker Working Group. *BEST ( Biomarkers , EndpointS , and Other Tools )*
- 566 *Resource*. Silver Spring, MD: Food and Drug Administration (US) Available at:
- 567 <https://www.ncbi.nlm.nih.gov/books/NBK326791/?report=classic>.
- 568 5. Port RG, Gandal MJ, Roberts TPL, Siegel SJ, Carlson GC. Convergence of circuit dysfunction
- 569 in ASD: a common bridge between diverse genetic and environmental risk factors and
- 570 common clinical electrophysiology. *Front Cell Neurosci.* 2014;8(December):1-14.
- 571 6. Jeste SS, Frohlich J, Loo SK. Electrophysiological biomarkers of diagnosis and outcome in
- 572 neurodevelopmental disorders. *Curr Opin Neurol.* 2015;28(2):110-116.
- 573 7. Wang J, Barstein J, Ethridge LE, Mosconi MW, Takarae Y, Sweeney JA. Resting state EEG
- 574 abnormalities in autism spectrum disorders. *J Neurodev Disord.* 2013;5(1):24.
- 575 8. David N, Schneider TR, Peiker I, Al-Jawahiri R, Engel AK, Milne E. Variability of cortical
- 576 oscillation patterns: a possible endophenotype in autism spectrum disorders? *Neurosci*
- 577 *Biobehav Rev.* 2016;71:590-600.
- 578 9. Ip CT, Ganz M, Ozenne B, et al. Pre-intervention test-retest reliability of EEG and ERP over
- 579 four recording intervals. *Int J Psychophysiol.* 2018;134(September):30-43.
- 580 10. Salinsky MC, Oken BS, Morehead L. Test-retest reliability in EEG frequency analysis.
- 581 *Electroencephalogr Clin Neurophysiol.* 1991;79(5):382-392.
- 582 11. Canivez GL, Watkins MW. Long-Term Stability of the Wechsler Intelligence Scale for
- 583 Children-Third Edition among Demographic Subgroups: Gender, Race/Ethnicity, and Age. *J*
- 584 *Psychoeduc Assess.* 1999;17(4):300-313.
- 585 12. Elliott CD. *Differential Ability Scales*. 2nd ed. Antonio, TX: Psychological Corporation; 1990.
- 586 13. Suarez-Revelo J, Ochoa-Gomez J, Duque-Grajales J. Improving test-retest reliability of
- 587 quantitative electroencephalography using different preprocessing approaches. *Proc Annu Int*
- 588 *Conf IEEE Eng Med Biol Soc EMBS.* 2016;2016-October:961-964.
- 589 14. He BJ, Zempel JM, Snyder AZ, Raichle ME. The temporal structures and functional
- 590 significance of scale-free brain activity. *Neuron.* 2010;66(3):353-369.
- 591 15. Haller M, Donoghue T, Peterson E, et al. *Parameterizing Neural Power Spectra.*; 2018.
- 592 doi:<https://doi.org/10.1101/299859>.
- 593 16. Grandy TH, Werkle-Bergner M, Chicherio C, Schmiedek F, Lövdén M, Lindenberger U. Peak
- 594 individual alpha frequency qualifies as a stable neurophysiological trait marker in healthy
- 595 younger and older adults. *Psychophysiology.* 2013;50(6):570-582.
- 596 17. Angelakis E, Lubar JF, Stathopoulou S, Kounios J. Peak alpha frequency: An
- 597 electroencephalographic measure of cognitive preparedness. *Clin Neurophysiol.*
- 598 2004;115(4):887-897.
- 599 18. McPartland JC. Considerations in biomarker development for neurodevelopmental disorders.
- 600 *Curr Opin Neurol.* 2016;29(2):118-122.
- 601 19. Lord C, Rutter M, DiLavore PC, Risi S. Autism Diagnostic Observation Schedule (ADOS).
- 602 2001.
- 603 20. Lord C, Rutter M, Le Couteur A. Autism Diagnostic Interview-Revised: a revised version of a
- 604 diagnostic interview for caregivers of individuals with possible pervasive developmental
- 605 disorders. *J Autism Dev Disord.* 1994;24(5):659-85.
- 606 21. American Psychiatric Association. *Diagnostic and Statistical Manual of Mental Disorders, 5th*
- 607 *Edition*. Arlington, VA: American Psychiatric Publishing, Inc.; 2013.
- 608 22. Webb SJ, Shic F, Murias M, et al. Biomarker Acquisition and Quality Control for Multisite
- 609 Studies□: The Autism Biomarkers Consortium for Clinical Trials. *[Submitted]*.
- 610 23. Elliott CD. *Differential Ability Scales-II (DAS-II)*. 2007.
- 611 24. Webb SJ, Shic F, Murias M, et al. The Autism Biomarkers Consortium for Clinical Trials:
- 612 Data Acquisition and Analytic Protocol. *[Submitted]*. 2019.

## Test-Retest Reliability of EEG Power in Children with Autism and Typical Development

- 613 25. Webb SJ, Borland H, Santhosh M, et al. *Data Acquisition and Analytic Core EEG Main Study*  
614 *Manual of Operations Version 2.2*. Seattle, WA; 2018.
- 615 26. Gabard-Durnam LJ, Mendez Leal AS, Wilkinson CL, Levin AR. The Harvard Automated  
616 Processing Pipeline for Electroencephalography (HAPPE): Standardized Processing Software  
617 for Developmental and High-Artifact Data. *Front Neurosci*. 2018;12(97):1-24.
- 618 27. Levin AR, Mendez Leal AS, Gabard-Durnam LJ, O’Leary HM. BEAPP: The Batch  
619 Electroencephalography Automated Processing Platform. *Front Neurosci*. 2018;12(August):1-  
620 13.
- 621 28. Winkler I, Haufe S, Tangermann M. Automatic Classification of Artifactual ICA-Components  
622 for Artifact Removal in EEG Signals. *Behav Brain Funct*. 2011;7(30):1-15.
- 623 29. Winkler I, Brandl S, Horn F, Waldburger E, Allefeld C, Tangermann M. Robust artifactual  
624 independent component classification for BCI practitioners. *J Neural Eng*.  
625 2014;11(035013):1-10.
- 626 30. Thomson DJ. Spectrum Estimation and Harmonic Analysis. *Proc IEEE*. 1982;70(9):1055-  
627 1096.
- 628 31. Babadi B, Brown EN. A review of multitaper spectral analysis. *IEEE Trans Biomed Eng*.  
629 2014;61(5):1555-64.
- 630 32. Donner A, Koval JJ. The estimation of intraclass correlation in the analysis of family data.  
631 *Biometrics*. 1980;36(1):19-25.
- 632 33. Cicchetti D V. Guidelines, Criteria, and Rules of Thumb for Evaluating Normed and  
633 Standardized Assessment Instruments in Psychology. *Psychol Assess*. 1994;6(4):284-290.
- 634 34. Di CZ, Crainiceanu CM, Caffo BS, Punjabi NM. Multilevel functional principal component  
635 analysis. *Ann Appl Stat*. 2009;3(1):458-488.
- 636 35. Micheel CM, Ball JR. *Evaluation of Biomarkers and Surrogate Endpoints in Chronic Disease*.  
637 Washington, D.C.: National Academies Press; 2010. doi:10.17226/12869.  
638  
639
